# Supplementary material for: Mostly natural sequencing-by-synthesis for scRNA-seq using Ultima sequencing
Source: PubMed Central journal article supplement (PMC9931582; doi:10.1038/s41587-022-01452-6), 2022-09-15
Supplement: 41587_2022_1452_MOESM1_ESM.pdf [file 41587_2022_1452_MOESM1_ESM.pdf]

---

**Supplementary information**

---

**Mostly natural sequencing-by-synthesis for  
scRNA-seq using Ultima sequencing**

---

In the format provided by the  
authors and unedited

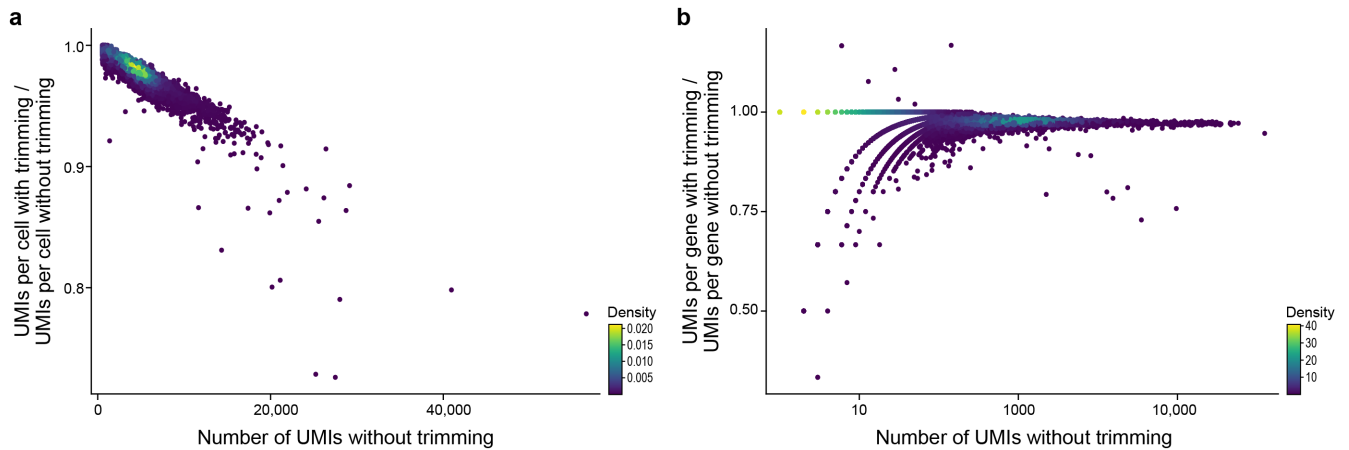

**Supplementary Figure 1. Relationship between UMI coverage and UMI trimming.**

The number of UMIs per (a) cell and (b) gene for 3' PBMC Illumina data with both full-length UMIs and UMIs trimmed to 9 bases. Ratio between the two (the number of UMIs per cell or gene with trimmed UMIs divided by the number of UMIs per cell or gene with untrimmed UMIs) is plotted versus the number of UMIs without trimming. Each point is colored by its local density in the graph.

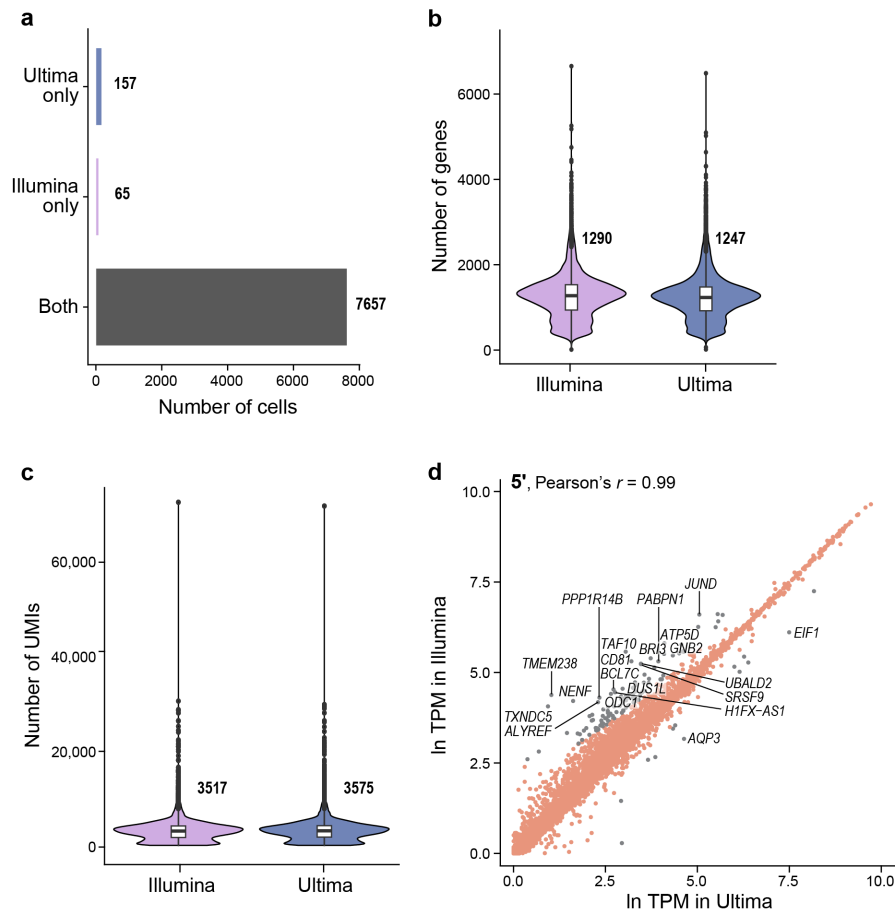

**Supplementary Figure 2. Quality metrics for 5' Ultima vs single-end Illumina data.**

(a) Number of cells identified by Cell Ranger only in Ultima, only in Illumina, or both.

Distribution of the number of genes (b) or UMIs (c) per cell. (d) Scatter plots with one point for each gene as in Fig. 2e. For all these analyses, reads were sampled so that Illumina and Ultima have the same number of reads.

# Supp. Fig. 3

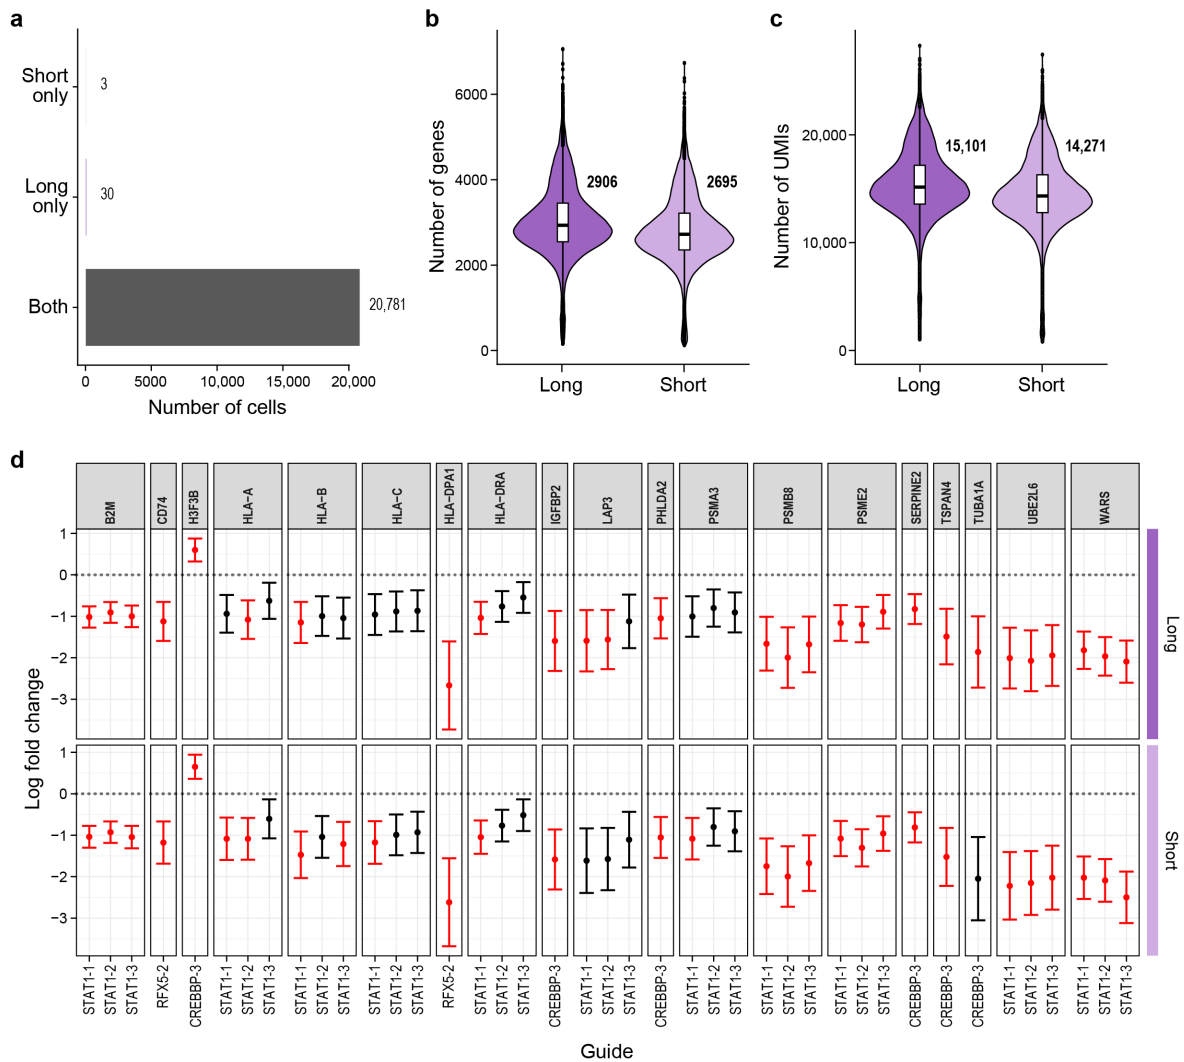

## Supplementary Figure 3. Perturb-seq data with shortened Read 2 length.

(a) Number of cells identified only in the shorter Illumina data, only in longer Illumina data, or in both. Distribution of the number of genes (b) or UMIs (c) per cell in short and long Illumina data. (d) We extracted all gene/guide pairs from our DE analysis with FDR < 0.05 in either shorter or longer Illumina data. Data processed and shown here as in Fig. 4f.

## **Supplementary Tables**

**Supplementary Table 1.** Sequencing metrics.

**Supplementary Table 2.** Comparison of read mapping between Ultima and Illumina.

**Supplementary Table 3.** Differentially expressed genes between Ultima and Illumina with  
5 standard or extended references.

**Supplementary Table 4.** Antibody, Perturb-seq, and hashing DNA barcodes.

**Supplementary Table 5.** PCR primers to convert libraries for Ultima sequencing.

**Supplementary Table 6.** Commands for initial sequence processing.



Table S3

| Method                                                                        | Illumina read type | Illumina Reference      | Ultima Reference**      | Total outliers* | Outliers upregulated in Illumina | Outliers upregulated in Ultima |
|-------------------------------------------------------------------------------|--------------------|-------------------------|-------------------------|-----------------|----------------------------------|--------------------------------|
| 3'                                                                            | Paired-end         | Standard                | Standard                | 182             | 131                              | 51                             |
| 3'                                                                            | Paired-end         | Standard                | Extended by single cell | 173             | 118                              | 55                             |
| 3'                                                                            | Paired-end         | Standard                | Extended by bulk        | 177             | 117                              | 60                             |
| 3'                                                                            | Paired-end         | Extended by single cell | Extended by single cell | 172             | 119                              | 53                             |
| 3'                                                                            | Paired-end         | Extended by bulk        | Extended by bulk        | 183             | 135                              | 48                             |
| 5'                                                                            | Paired-end         | Standard                | Standard                | 454             | 342                              | 112                            |
| 5'                                                                            | Paired-end         | Standard                | Extended by single cell | 352             | 233                              | 119                            |
| 5'                                                                            | Paired-end         | Standard                | Extended by bulk        | 350             | 234                              | 116                            |
| 5'                                                                            | Paired-end         | Extended by single cell | Extended by single cell | 346             | 247                              | 109                            |
| 5'                                                                            | Paired-end         | Extended by bulk        | Extended by bulk        | 349             | 247                              | 102                            |
| 5'                                                                            | Single-end         | Standard                | Standard                | 122             | 109                              | 13                             |
|                                                                               |                    |                         |                         |                 |                                  |                                |
|                                                                               |                    |                         |                         |                 |                                  |                                |
| *Outliers are genes with absolute logFC>log(2) in Ultima relative to Illumina |                    |                         |                         |                 |                                  |                                |
| **Uses Ultima data downsampled to have the same number of reads as Illumina   |                    |                         |                         |                 |                                  |                                |

table S5

| Name                                                                  | Sequence                                                                   | Notes                             |
|-----------------------------------------------------------------------|----------------------------------------------------------------------------|-----------------------------------|
| PS-SBC                                                                | 5'-CCATCTCATCCCTGCGTGTCTCCGACTCAGCGGAAGAACCTCGATCTACACGACGCTCTTCCGATC*T-3' | IA region, Read 1 binding region  |
| PB                                                                    | 5'-CCTATCCCCTGTGTGCCTTGGCAGTCTCAGCAGACGTGTGCTCTTCCGATC*T-3'                | UBA region, Read 2 binding region |
|                                                                       |                                                                            |                                   |
| * = phosphorothioate bond modification protecting it from degradation |                                                                            |                                   |



Table S6

|                               |                                                                                                                                                                                                                                                                                                                                                                                                                                                   |
|-------------------------------|---------------------------------------------------------------------------------------------------------------------------------------------------------------------------------------------------------------------------------------------------------------------------------------------------------------------------------------------------------------------------------------------------------------------------------------------------|
| 3' Ultima step 1              | cutadapt -j 0 --discard-untrimmed --pair-filter any -a<br>CTACACGACGCTCTCCGATCT;max_error_rate=0.2;min_overlap=10;required...AGATCGGAAGAGCACACGTCTG;max_error_rate=0.2;min_overlap=6 -U<br>50 -q 30 -A TTTTTTTTTTTT;max_error_rate=0.2;min_overlap=8;required...AGATCGGAAGAGCACACGTCTG;max_error_rate=0.2;min_overlap=6 -o<br><output_read1_long> -p <output_read2> --minimum-length 28:50 <input_fastq> <input_fastq>                            |
| 3' Ultima step 2              | cutadapt -j 0 --minimum-length 28 --maximum-length 28 --length 28 -o <output_read1> <output_read1_long>                                                                                                                                                                                                                                                                                                                                           |
| 3' Ultima step 3              | zcat <output_read2>   awk '{if ((NR%4 == 2)    (NR%4 == 0)) {print substr(\$0,1+5,90)} else {print \$0}}'   seqkit -j 8 seq -p -r -t DNA   gzip ><br><output_read2_revcom>                                                                                                                                                                                                                                                                        |
| 5' Ultima step 1              | cutadapt -j 0 --discard-untrimmed --pair-filter any -a<br>CTACACGACGCTCTCCGATCT;max_error_rate=0.2;min_overlap=10;required...AGATCGGAAGAGCACACGTCTG;max_error_rate=0.2;min_overlap=6 -U<br>48 -q 30 -A ^TTTCTTATATGGG;max_error_rate=0.5;min_overlap=8;required...AGATCGGAAGAGCACACGTCTG;max_error_rate=0.2;min_overlap=6 -o<br><output_read1_long> -p <output_read2> --minimum-length 26:50 --maximum-length 390:315 <input_fastq> <input_fastq> |
| 5' Ultima step 2              | cutadapt -j 0 --minimum-length 26 --maximum-length 26 --length 26 -o <output_read1> <output_read1_long>                                                                                                                                                                                                                                                                                                                                           |
| 5' Ultima step 3              | zcat <output_read2>   awk '{if ((NR%4 == 2)    (NR%4 == 0)) {print substr(\$0,1+3,90)} else {print \$0}}'   seqkit -j 8 seq -p -r -t DNA   gzip ><br><output_read2_revcom>                                                                                                                                                                                                                                                                        |
| 5' Illumina single-end step 1 | cutadapt -j 0 --discard-untrimmed --pair-filter any -a<br>CTACACGACGCTCTCCGATCT;max_error_rate=0.2;min_overlap=10;required...AGATCGGAAGAGCACACGTCTG;max_error_rate=0.2;min_overlap=6 -U<br>48 -q 30 -A ^TTTCTTATATGGG;max_error_rate=0.5;min_overlap=8;required...AGATCGGAAGAGCACACGTCTG;max_error_rate=0.2;min_overlap=6 -o<br><output_read1_long> -p <output_read2> --minimum-length 26:50 --maximum-length 390:315 <input_fastq> <input_fastq> |
| 5' Illumina single-end step 2 | cutadapt -j 0 --minimum-length 26 --maximum-length 26 --length 26 -o <output_read1> <output_read1_long>                                                                                                                                                                                                                                                                                                                                           |
| 5' Illumina single-end step 3 | zcat <output_read2>   awk '{if ((NR%4 == 2)    (NR%4 == 0)) {print substr(\$0,1+3,90)} else {print \$0}}'   seqkit -j 8 seq -p -r -t DNA   gzip ><br><output_read2_revcom>                                                                                                                                                                                                                                                                        |
